# Supplementary material for: An integrated strategy for catalytic co-production of jet fuel range alkenes, tetrahydrofurfuryl alcohol, and 1,2-pentanediol from lignocellulosic biomass
Source: Royal Society of Chemistry journal article supplement (doi:10.1039/c7gc02368e), 2017-01-01
Supplement: c7gc02368e1.pdf [file c7gc02368e1.pdf]

## **ELECTRONIC SUPPLEMENTARY INFORMATION**

### **Integrated strategy for catalytic co-production of jet fuel range alkenes, tetrahydrofurfuryl alcohol, and 1,2- pentanediol from lignocellulosic biomass**

*Jaewon Byun and Jeehoon Han \**

School of Chemical Engineering, Chonbuk National University, Jeonju 561-756, Korea

## A. Process simulation

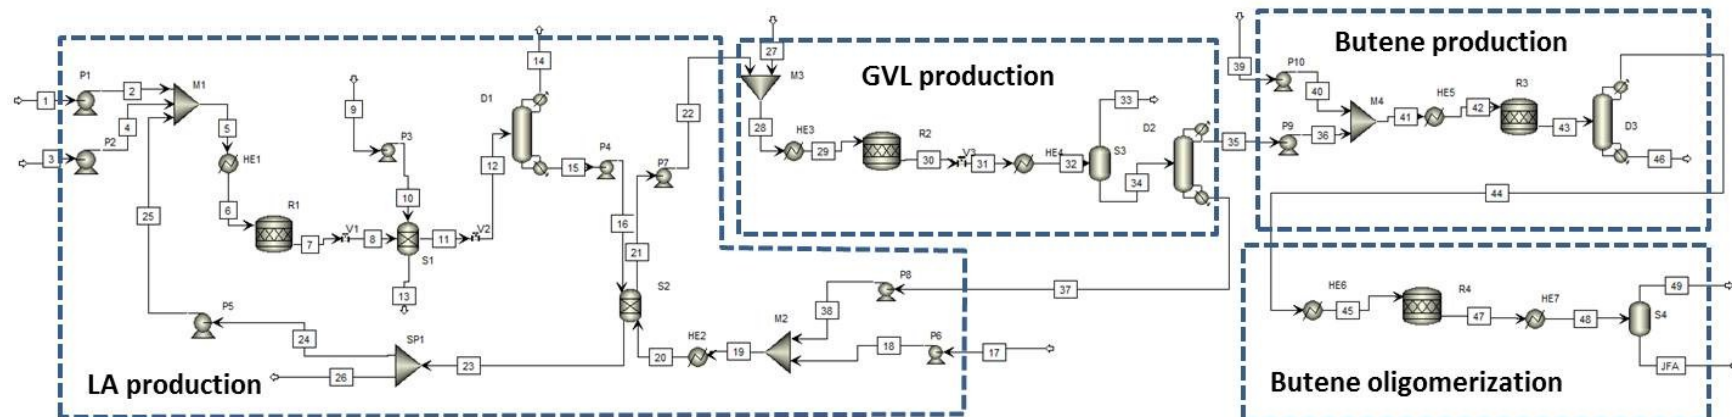

Figure S.1 Detailed process flow diagram of the C<sub>6</sub> conversion step

Table S.1 Detailed mass and energy balance of the C<sub>6</sub> conversion step

| Streams                         | 1    | 6    | 7    | 11   | 15  | 20  | 21   | 29   | 30   | 34   | 35  | 42  | 43  | 44  | 47  | JFA |
|---------------------------------|------|------|------|------|-----|-----|------|------|------|------|-----|-----|-----|-----|-----|-----|
| Mass flow [t per day]           |      |      |      |      |     |     |      |      |      |      |     |     |     |     |     |     |
| C <sub>6</sub>                  | 820  | 820  | 0    | 0    | 0   | 0   | 0    | 0    | 0    | 0    | 0   | 0   | 0   | 0   | 0   | 0   |
| Lignin                          | 360  | 360  | 360  | 0    | 0   | 0   | 0    | 0    | 0    | 0    | 0   | 0   | 0   | 0   | 0   | 0   |
| H <sub>2</sub> O                | 954  | 1933 | 1976 | 5170 | 165 | 0   | 0    | 0    | 40   | 29   | 29  | 135 | 135 | 0   | 0   | 0   |
| C <sub>5</sub>                  | 12   | 12   | 12   | 0    | 0   | 0   | 0    | 0    | 0    | 0    | 0   | 0   | 0   | 0   | 0   | 0   |
| Xylose                          | 20   | 39   | 39   | 37   | 37  | 0   | 0    | 0    | 0    | 0    | 0   | 0   | 0   | 0   | 0   | 0   |
| FF                              | 1    | 1    | 1    | 1    | 0   | 0   | 0    | 0    | 0    | 0    | 0   | 0   | 0   | 0   | 0   | 0   |
| SBP                             | 0    | 0    | 0    | 0    | 0   | 879 | 879  | 879  | 879  | 871  | 1   | 1   | 1   | 0   | 0   | 0   |
| SA                              | 0    | 95   | 95   | 91   | 91  | 0   | 0    | 0    | 0    | 0    | 0   | 0   | 0   | 0   | 0   | 0   |
| Humins                          | 0    | 0    | 394  | 0    | 0   | 0   | 0    | 0    | 0    | 0    | 0   | 0   | 0   | 0   | 0   | 0   |
| LA                              | 0    | 14   | 288  | 277  | 277 | 5   | 254  | 254  | 5    | 5    | 0   | 0   | 0   | 0   | 0   | 0   |
| FA                              | 0    | 1    | 110  | 106  | 4   | 0   | 1    | 1    | 0    | 0    | 0   | 0   | 0   | 0   | 0   | 0   |
| CO <sub>2</sub>                 | 0    | 0    | 0    | 0    | 0   | 0   | 0    | 0    | 1    | 0    | 0   | 0   | 88  | 88  | 88  | 5   |
| H <sub>2</sub>                  | 0    | 0    | 0    | 0    | 0   | 0   | 0    | 5    | 0    | 0    | 0   | 0   | 0   | 0   | 0   | 0   |
| GVL                             | 0    | 0    | 0    | 0    | 0   | 0   | 0    | 0    | 206  | 203  | 202 | 202 | 2   | 0   | 0   | 0   |
| MTHF                            | 0    | 0    | 0    | 0    | 0   | 0   | 0    | 0    | 8    | 5    | 5   | 5   | 5   | 0   | 0   | 0   |
| C <sub>4</sub> H <sub>8</sub>   | 0    | 0    | 0    | 0    | 0   | 0   | 0    | 0    | 0    | 0    | 0   | 0   | 112 | 112 | 1   | 1   |
| C <sub>8</sub> H <sub>16</sub>  | 0    | 0    | 0    | 0    | 0   | 0   | 0    | 0    | 0    | 0    | 0   | 0   | 0   | 0   | 33  | 32  |
| C <sub>12</sub> H <sub>24</sub> | 0    | 0    | 0    | 0    | 0   | 0   | 0    | 0    | 0    | 0    | 0   | 0   | 0   | 0   | 29  | 29  |
| C <sub>16</sub> H <sub>32</sub> | 0    | 0    | 0    | 0    | 0   | 0   | 0    | 0    | 0    | 0    | 0   | 0   | 0   | 0   | 28  | 28  |
| C <sub>20</sub> H <sub>40</sub> | 0    | 0    | 0    | 0    | 0   | 0   | 0    | 0    | 0    | 0    | 0   | 0   | 0   | 0   | 21  | 21  |
| Total flow [t per day]          | 2167 | 3275 | 3275 | 5682 | 574 | 884 | 1134 | 1139 | 1139 | 1112 | 237 | 343 | 343 | 200 | 200 | 115 |
| Temperature [K]                 | 298  | 423  | 423  | 352  | 383 | 473 | 436  | 493  | 493  | 425  | 394 | 648 | 648 | 379 | 443 | 373 |
| Pressure [bar]                  | 1    | 34   | 34   | 9    | 1   | 16  | 16   | 34   | 34   | 1    | 1   | 35  | 35  | 35  | 35  | 35  |
| Enthalpy flow [MW]              | 438  | 743  | 749  | 1712 | 100 | 2   | 32   | 29   | 32   | 32   | 28  | 50  | 49  | 16  | 18  | 4   |

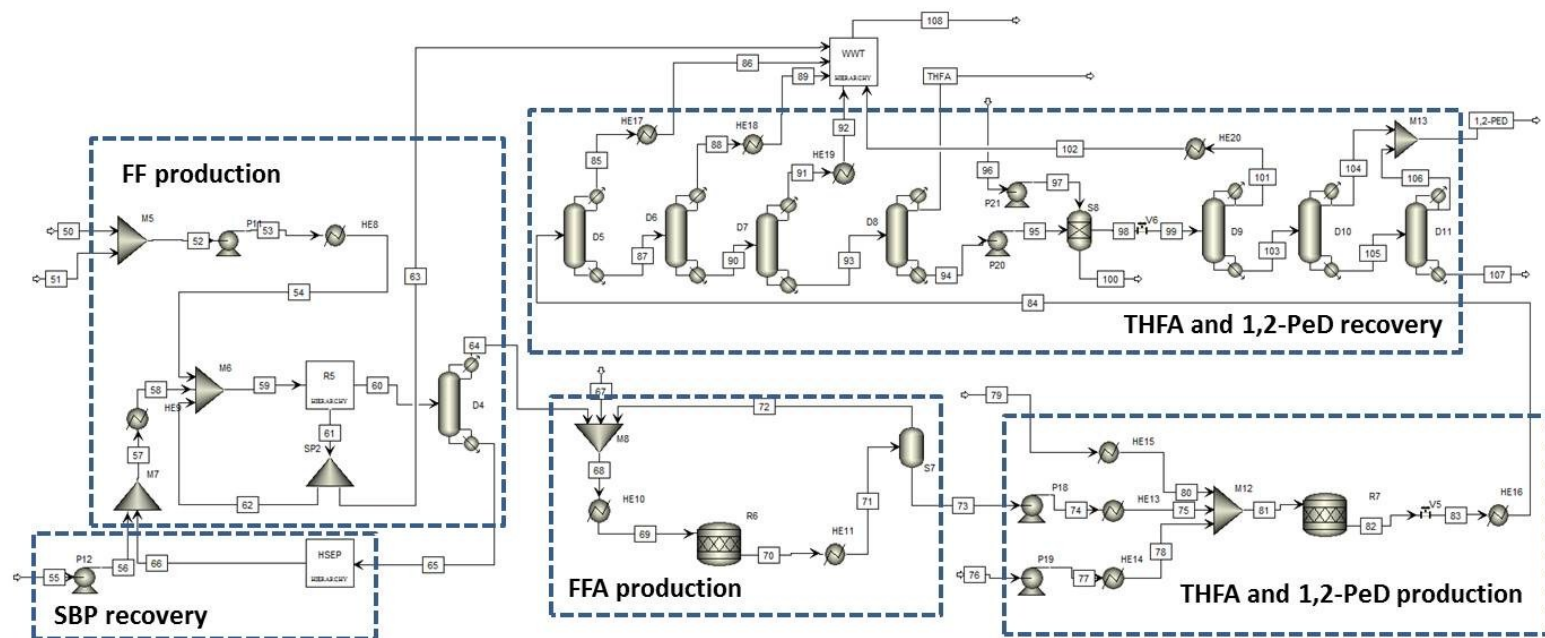

Figure S.2 Detailed process flow diagram of the C<sub>5</sub> conversion step

Table S.2 Detailed mass and energy balance of the C<sub>5</sub> conversion step (design A)

| Streams                | 50   | 59    | 60   | 64  | 69  | 70  | 73  | 81   | 82   | 87   | 90  | 93  | 94  | 98  | 103 | 105 | 107 | THFA | 1,2-PeD |
|------------------------|------|-------|------|-----|-----|-----|-----|------|------|------|-----|-----|-----|-----|-----|-----|-----|------|---------|
| Mass flow [t per day]  |      |       |      |     |     |     |     |      |      |      |     |     |     |     |     |     |     |      |         |
| Xylose                 | 484  | 491   | 0    | 0   | 0   | 0   | 0   | 0    | 0    | 0    | 0   | 0   | 0   | 0   | 0   | 0   | 0   | 0    | 0       |
| HCl                    | 0    | 118   | 0    | 0   | 0   | 0   | 0   | 0    | 0    | 0    | 0   | 0   | 0   | 0   | 0   | 0   | 0   | 0    | 0       |
| NaCl                   | 0    | 189   | 0    | 0   | 0   | 0   | 0   | 0    | 0    | 0    | 0   | 0   | 0   | 0   | 0   | 0   | 0   | 0    | 0       |
| H <sub>2</sub> O       | 9152 | 32145 | 0    | 0   | 0   | 0   | 0   | 2269 | 2269 | 1361 | 136 | 1   | 0   | 87  | 0   | 0   | 0   | 1    | 0       |
| SBP                    | 0    | 4939  | 4939 | 0   | 0   | 0   | 0   | 0    | 0    | 0    | 0   | 0   | 0   | 0   | 0   | 0   | 0   | 0    | 0       |
| FF                     | 17   | 37    | 255  | 255 | 257 | 5   | 3   | 3    | 3    | 0    | 0   | 0   | 0   | 0   | 0   | 0   | 0   | 0    | 0       |
| FFA                    | 0    | 0     | 0    | 0   | 77  | 330 | 252 | 252  | 0    | 0    | 0   | 0   | 0   | 0   | 0   | 0   | 0   | 0    | 0       |
| SA                     | 0    | 0     | 0    | 0   | 0   | 0   | 0   | 0    | 0    | 0    | 0   | 0   | 0   | 0   | 0   | 0   | 0   | 0    | 0       |
| H <sub>2</sub>         | 0    | 0     | 0    | 0   | 0   | 0   | 0   | 12   | 0    | 0    | 0   | 0   | 0   | 0   | 0   | 0   | 0   | 0    | 0       |
| Humins                 | 0    | 0     | 96   | 0   | 0   | 5   | 5   | 5    | 8    | 8    | 8   | 8   | 8   | 0   | 0   | 0   | 0   | 0    | 0       |
| THFA                   | 0    | 0     | 0    | 0   | 0   | 0   | 0   | 0    | 193  | 192  | 190 | 188 | 4   | 4   | 0   | 0   | 0   | 184  | 0       |
| 1,2-PeD                | 0    | 0     | 0    | 0   | 0   | 0   | 0   | 0    | 65   | 65   | 65  | 65  | 64  | 62  | 62  | 6   | 3   | 1    | 59      |
| 1,4-PeD                | 0    | 0     | 0    | 0   | 0   | 0   | 0   | 0    | 1    | 1    | 1   | 1   | 1   | 1   | 1   | 1   | 1   | 0    | 0       |
| HMFA                   | 0    | 0     | 0    | 0   | 0   | 0   | 0   | 0    | 1    | 1    | 1   | 1   | 1   | 1   | 1   | 1   | 1   | 0    | 0       |
| Total flow [t per day] | 9653 | 37920 | 5291 | 255 | 348 | 348 | 261 | 2541 | 2541 | 1628 | 401 | 264 | 78  | 154 | 63  | 8   | 4   | 186  | 59      |
| Temperature [K]        | 303  | 443   | 443  | 435 | 453 | 453 | 393 | 393  | 393  | 374  | 377 | 451 | 485 | 366 | 484 | 486 | 488 | 440  | 483     |
| Pressure [bar]         | 1    | 10    | 1    | 1   | 1   | 1   | 1   | 30   | 30   | 1    | 1   | 1   | 1   | 9   | 1   | 1   | 1   | 1    | 1       |
| Enthalpy flow [MW]     | 1683 | 5685  | 17   | 4   | 5   | 7   | 8   | 413  | 419  | 258  | 37  | 12  | 4   | 19  | 3   | 0   | 0   | 8    | 3       |

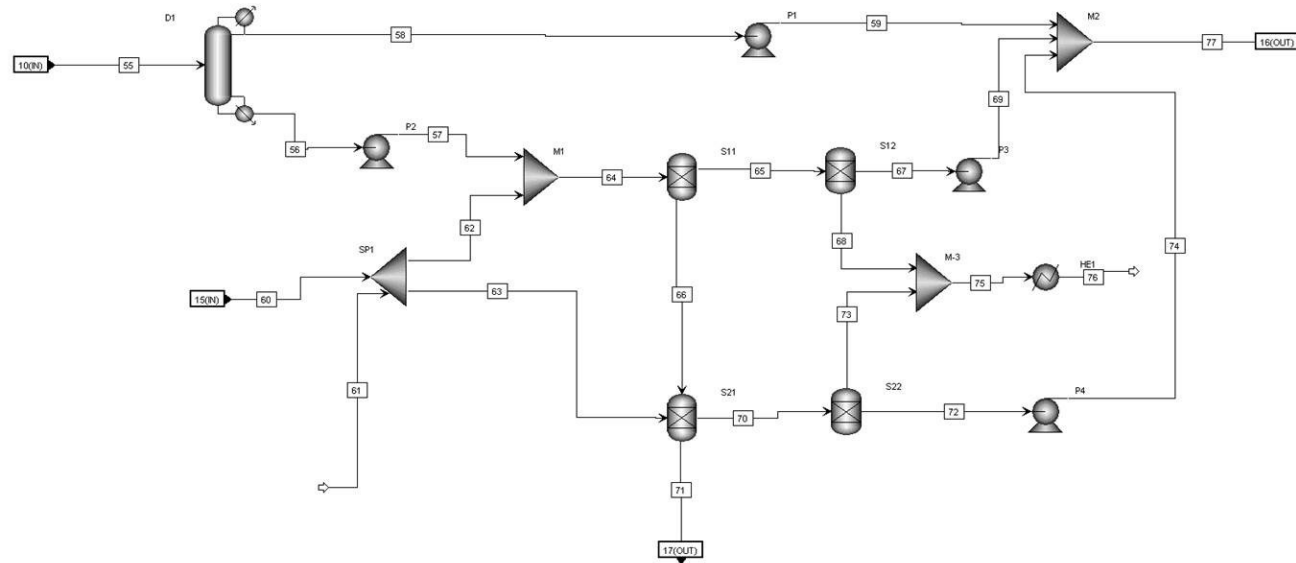

**Figure S.3** Detailed process flow diagram of the SBP recovery for C<sub>5</sub> conversion step

**Table S.3** Detailed mass and energy balance of the SBP recovery for C<sub>5</sub> conversion step

| Streams                | 109  | 112  | 110 | 119  | 120  | 121 | 122 | 125 | 127 | 132  |
|------------------------|------|------|-----|------|------|-----|-----|-----|-----|------|
| Mass flow [t per day]  |      |      |     |      |      |     |     |     |     |      |
| Xylose                 | 0    | 0    | 0   | 0    | 0    | 0   | 0   | 0   | 0   | 0    |
| HCl                    | 0    | 0    | 0   | 0    | 0    | 0   | 0   | 0   | 0   | 0    |
| NaCl                   | 0    | 0    | 0   | 0    | 0    | 0   | 0   | 0   | 0   | 0    |
| H <sub>2</sub> O       | 0    | 0    | 0   | 1121 | 1013 | 108 | 0   | 305 | 0   | 0    |
| SBP                    | 4930 | 4058 | 869 | 869  | 835  | 34  | 835 | 34  | 34  | 4927 |
| FF                     | 0    | 0    | 0   | 0    | 0    | 0   | 0   | 0   | 0   | 0    |
| FFA                    | 0    | 0    | 0   | 0    | 0    | 0   | 0   | 0   | 0   | 0    |
| H <sub>2</sub>         | 0    | 0    | 0   | 0    | 0    | 0   | 0   | 0   | 0   | 0    |
| Humins                 | 96   | 0    | 96  | 96   | 0    | 96  | 0   | 0   | 0   | 0    |
| THFA                   | 0    | 0    | 0   | 0    | 0    | 0   | 0   | 0   | 0   | 0    |
| 1,2-PeD                | 0    | 0    | 0   | 0    | 0    | 0   | 0   | 0   | 0   | 0    |
| 1,4-PeD                | 0    | 0    | 0   | 0    | 0    | 0   | 0   | 0   | 0   | 0    |
| HMFA                   | 0    | 0    | 0   | 0    | 0    | 0   | 0   | 0   | 0   | 0    |
| Total flow [t per day] | 5026 | 4058 | 967 | 2088 | 1848 | 238 | 835 | 336 | 34  | 4927 |
| Temperature [K]        | 503  | 502  | 506 | 449  | 449  | 449 | 449 | 434 | 434 | 493  |
| Pressure [bar]         | 1    | 1    | 1   | 1    | 1    | 1   | 1   | 1   | 1   | 1    |
| Enthalpy flow [MW]     | 3    | 0    | 3   | 201  | 179  | 22  | 1   | 54  | 0   | 1    |

## B. Heat integration

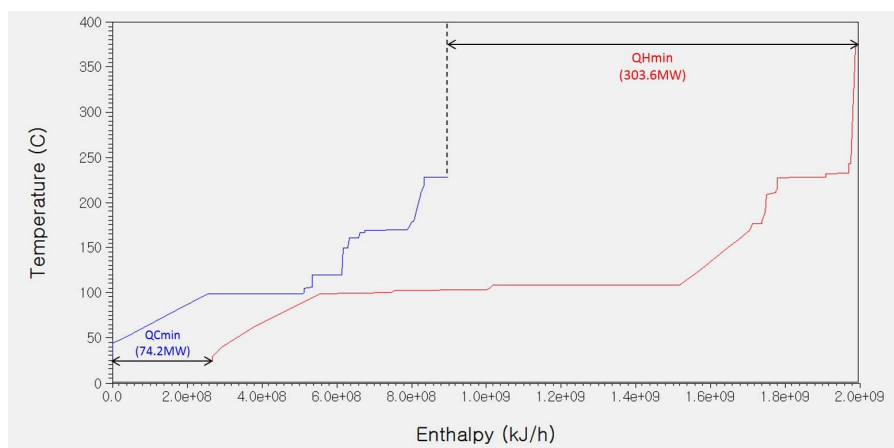

| Stream No. | Process streams                   | Inlet T [K] | Outlet T [K] | Enthalpy [kJ/h] |
|------------|-----------------------------------|-------------|--------------|-----------------|
| 1          | Pretreatment 218→520A             | 101.0       | 100.0        | 588134          |
| 2          | Pretreatment 502→501              | 41.0        | 95.0         | 69059329        |
| 3          | Pretreatment 520A→520             | 100.0       | 30.0         | 11267412        |
| 4          | Pretreatment 256→240              | 81.6        | 50.0         | 7552880         |
| 5          | Pretreatment 250→251              | 50.0        | 38.0         | 402408          |
| 6          | Pretreatment 214→217              | 61.8        | 190.0        | 103275098       |
| 7          | C <sub>6</sub> conversion 5→6     | 307.0       | 423.0        | 55104008        |
| 8          | C <sub>6</sub> conversion 6→7     | 423.5       | 423.0        | 11792596        |
| 9          | C <sub>6</sub> conversion 12→14   | 373.8       | 373.3        | 365307          |
| 10         | C <sub>6</sub> conversion 12→15   | 382.1       | 382.6        | 495618318       |
| 11         | C <sub>6</sub> conversion 19→20   | 501.4       | 473.0        | 2815345         |
| 12         | C <sub>6</sub> conversion 28→29   | 433.3       | 493.0        | 7435898         |
| 13         | C <sub>6</sub> conversion 31→32   | 456.0       | 425.0        | 7276699         |
| 14         | C <sub>6</sub> conversion 34→35   | 394.3       | 393.8        | 56759155        |
| 15         | C <sub>6</sub> conversion 34→37   | 501.6       | 502.1        | 63275479        |
| 16         | C <sub>6</sub> conversion 41→42   | 353.3       | 648.0        | 25486065        |
| 17         | C <sub>6</sub> conversion 42→43   | 647.5       | 648.0        | 1490114         |
| 18         | C <sub>6</sub> conversion 43→44   | 379.8       | 379.3        | 20520800        |
| 19         | C <sub>6</sub> conversion 43→46   | 517.1       | 517.6        | 5170134         |
| 20         | C <sub>6</sub> conversion 44→45   | 379.3       | 443.0        | 815026          |
| 21         | C <sub>6</sub> conversion 45→47   | 443.5       | 443.0        | 5873977         |
| 22         | C <sub>6</sub> conversion 47→48   | 443.0       | 373.0        | 1163098         |
| 23         | C <sub>5</sub> conversion 53→54   | 303.7       | 443.0        | 248978513       |
| 24         | C <sub>5</sub> conversion 57→58   | 493.6       | 443.0        | 27220005        |
| 25         | C <sub>5</sub> conversion 59→60   | 443.5       | 443.0        | 105539854       |
| 26         | C <sub>5</sub> conversion 60→64   | 435.1       | 434.6        | 27264953        |
| 27         | C <sub>5</sub> conversion 60→65   | 502.3       | 502.8        | 64705953        |
| 28         | C <sub>5</sub> conversion 109→112 | 502.4       | 501.9        | 63314399        |
| 29         | C <sub>5</sub> conversion 109→110 | 506.0       | 506.5        | 63339917        |
| 30         | C <sub>5</sub> conversion 130→131 | 449.0       | 434.0        | 4199909         |
| 31         | C <sub>5</sub> conversion 68→69   | 404.0       | 453.0        | 1370765         |
| 32         | C <sub>5</sub> conversion 69→70   | 453.5       | 453.0        | 7081795         |

| Utility streams    | Inlet T [K] | Outlet T [K] | Cp [kJ/kg°C] |
|--------------------|-------------|--------------|--------------|
| Cooling water      | 298.2       | 308.2        | 4.2          |
| Refrigerated water | 277.6       | 287.6        | 4.2          |
| Low pressure steam | 421.7       | 420.7        | 2121.2       |
| Thermal fluid      | 673.1       | 672.1        | 206.0        |

| Stream No. | Process streams                   | Inlet T [K] | Outlet T [K] | Enthalpy [kJ/h] |
|------------|-----------------------------------|-------------|--------------|-----------------|
| 33         | C <sub>5</sub> conversion 70→71   | 453.0       | 393.0        | 7381501         |
| 34         | C <sub>5</sub> conversion 74→75   | 394.8       | 393.2        | 37970           |
| 35         | C <sub>5</sub> conversion 77→78   | 299.2       | 393.2        | 37617027        |
| 36         | C <sub>5</sub> conversion 79→80   | 298.2       | 393.2        | 655298          |
| 37         | C <sub>5</sub> conversion 81→82   | 393.7       | 393.2        | 20450641        |
| 38         | C <sub>5</sub> conversion 83→84   | 373.5       | 373.5        | 8779467         |
| 39         | C <sub>5</sub> conversion 84→85   | 373.7       | 373.2        | 104100473       |
| 40         | C <sub>5</sub> conversion 84→87   | 373.3       | 373.8        | 189912901       |
| 41         | C <sub>5</sub> conversion 85→86   | 373.2       | 318.2        | 94598867        |
| 42         | C <sub>5</sub> conversion 87→88   | 373.7       | 373.2        | 127667383       |
| 43         | C <sub>5</sub> conversion 87→90   | 376.8       | 377.3        | 243606623       |
| 44         | C <sub>5</sub> conversion 88→89   | 373.2       | 318.2        | 127536512       |
| 45         | C <sub>5</sub> conversion 90→91   | 373.7       | 373.2        | 9242584         |
| 46         | C <sub>5</sub> conversion 90→93   | 450.5       | 451.0        | 23590162        |
| 47         | C <sub>5</sub> conversion 91→92   | 373.2       | 318.2        | 14149002        |
| 48         | C <sub>5</sub> conversion 93→THFA | 440.7       | 440.2        | 11886190        |
| 49         | C <sub>5</sub> conversion 93→94   | 484.4       | 484.9        | 12010764        |
| 50         | C <sub>5</sub> conversion 99→101  | 373.8       | 373.3        | 8530826         |
| 51         | C <sub>5</sub> conversion 99→103  | 483.0       | 483.5        | 9545896         |
| 52         | C <sub>5</sub> conversion 103→104 | 483.7       | 483.2        | 2210147         |
| 53         | C <sub>5</sub> conversion 103→105 | 485.5       | 486.0        | 2210221         |
| 54         | C <sub>5</sub> conversion 105→106 | 483.8       | 483.3        | 331127          |
| 55         | C <sub>5</sub> conversion 105→107 | 487.9       | 488.4        | 331188          |
| 56         | C <sub>5</sub> conversion 101→102 | 373.3       | 318.2        | 872702          |

**Figure S.4** Composite curve for the design A (obtained using ASPEN Energy Analyzer); minimum temperature difference ( $\Delta T_{\min}$ ) is 10 K. The estimated total minimum area requirement ( $A_{\min}$ ) is 87836 m<sup>2</sup>. The total minimum hot/cold utility requirement ( $Q_{H\min}/Q_{C\min}$ ) is 303.6/74.2 MW.

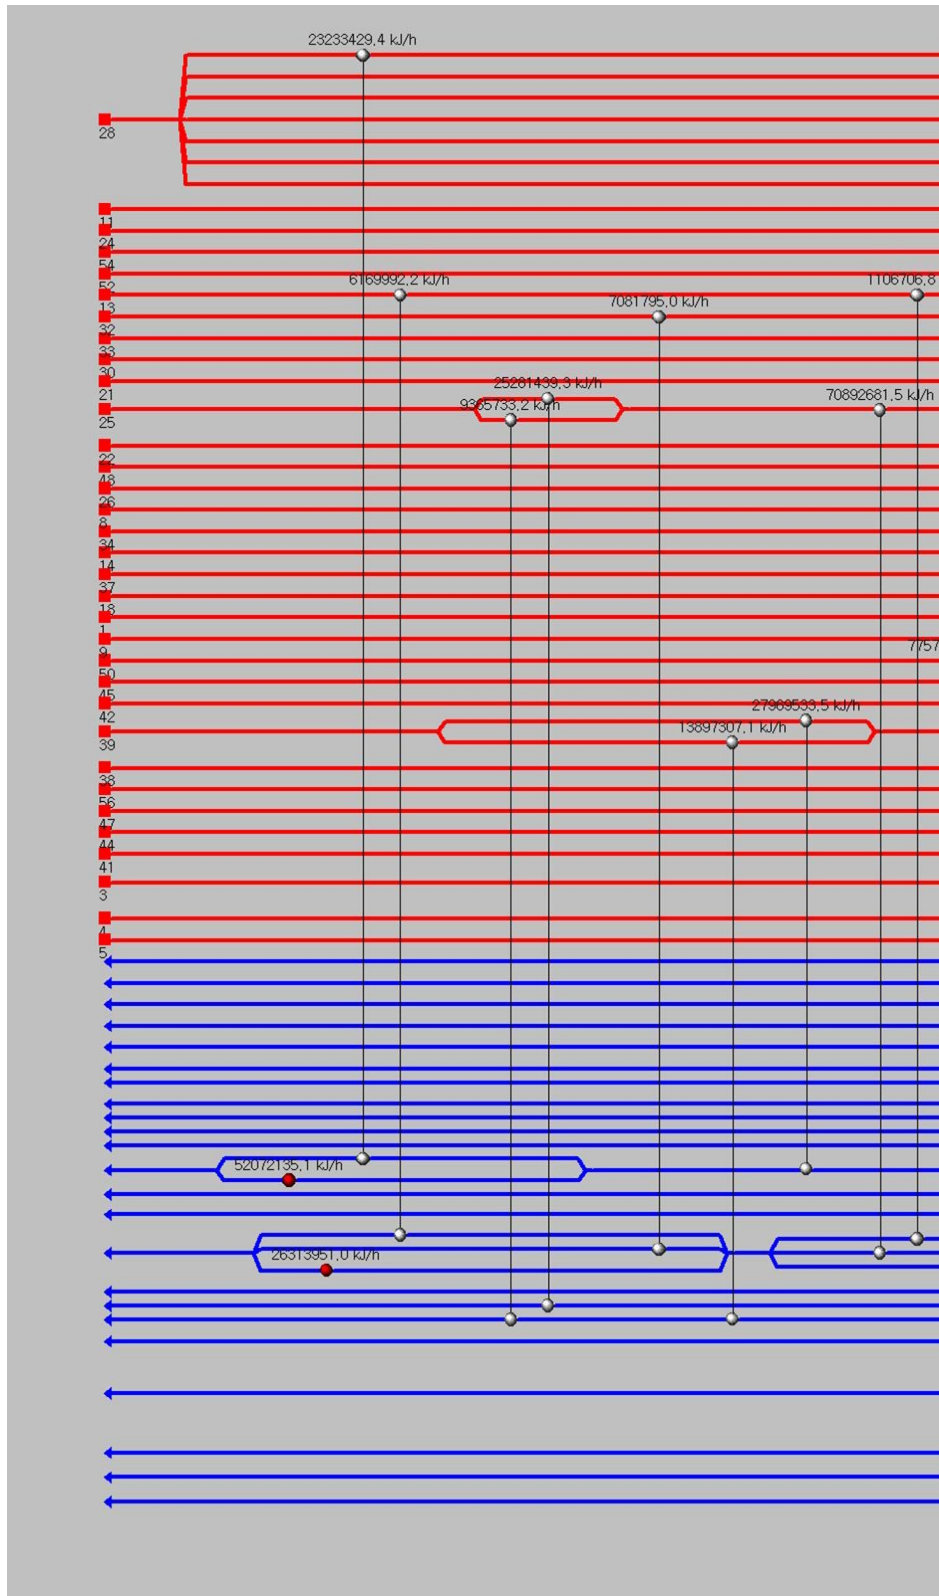

Figure S.5 Grid diagram for the design A



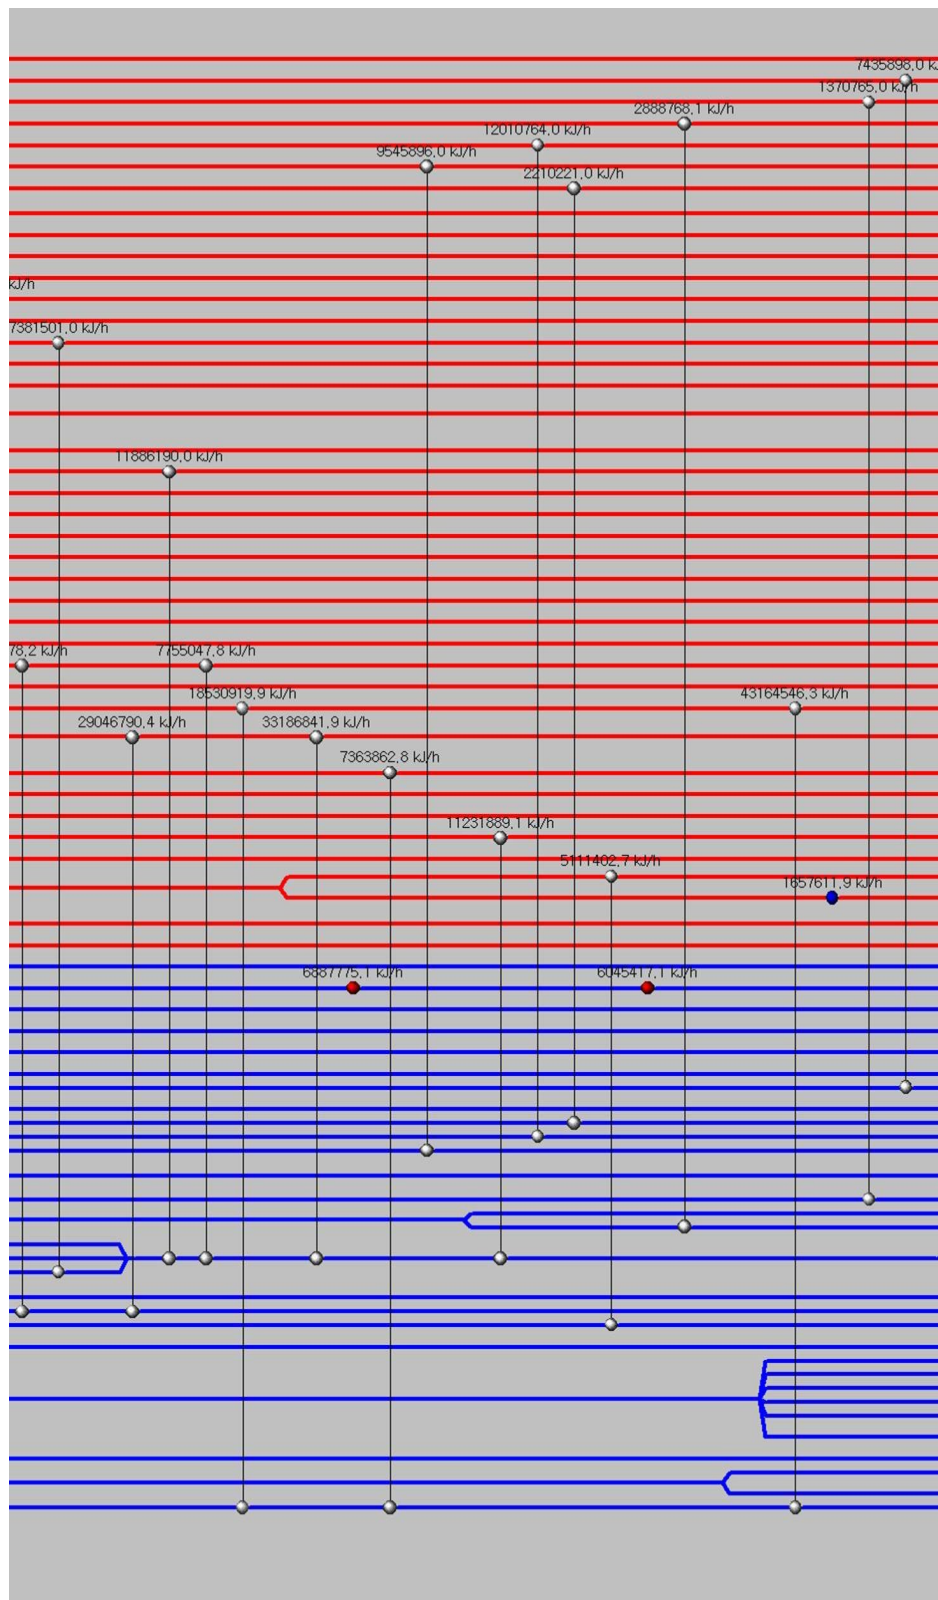

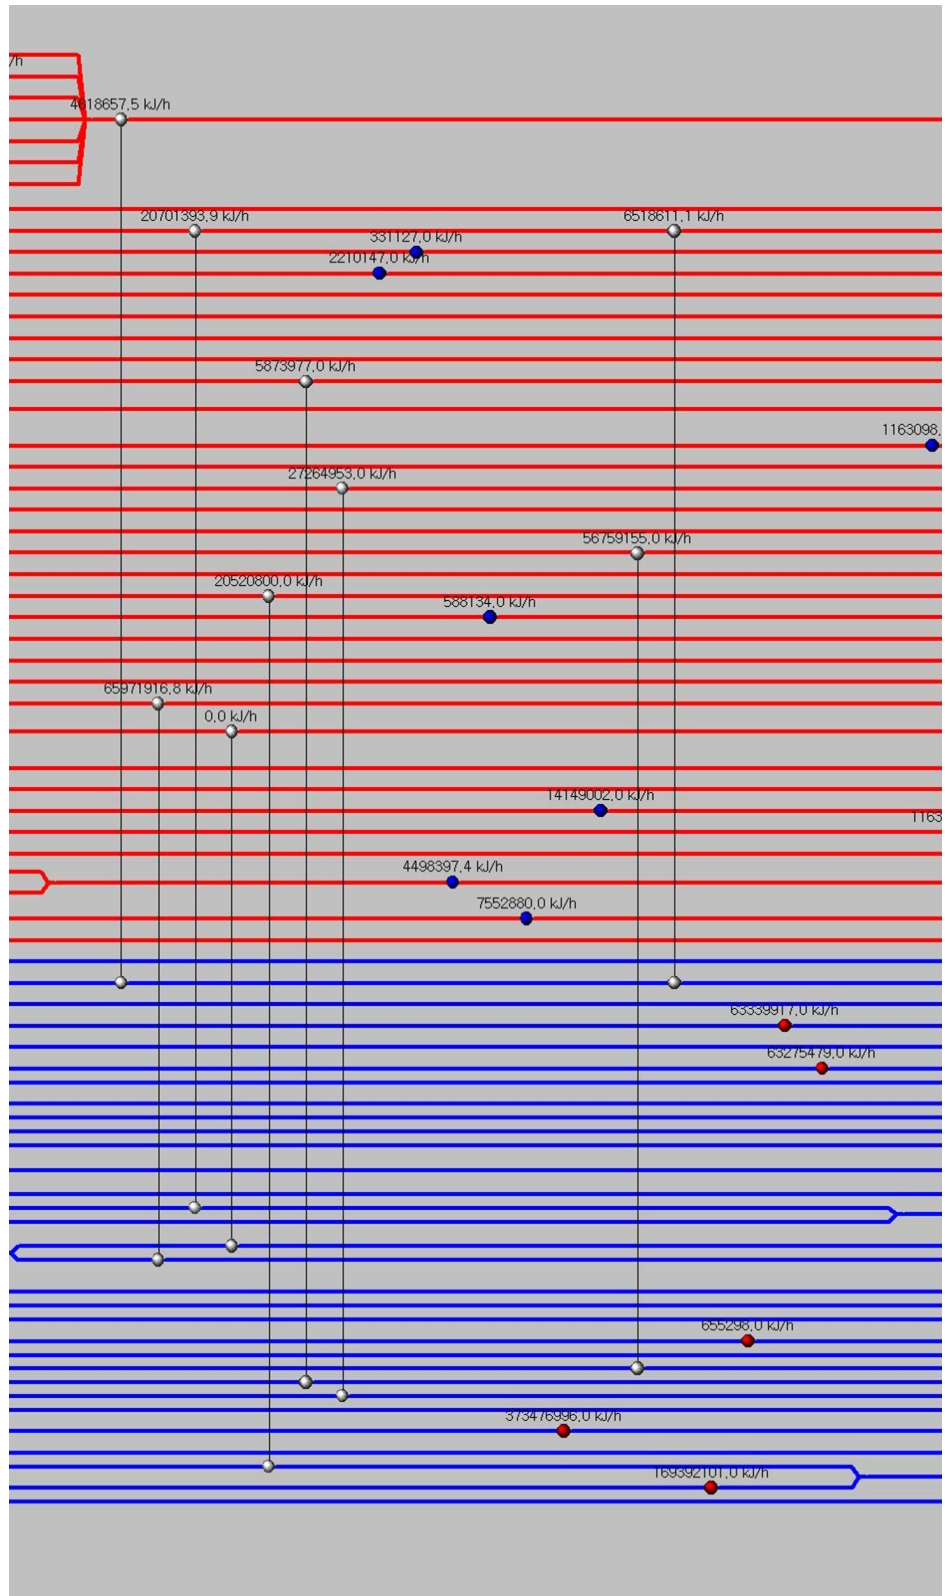



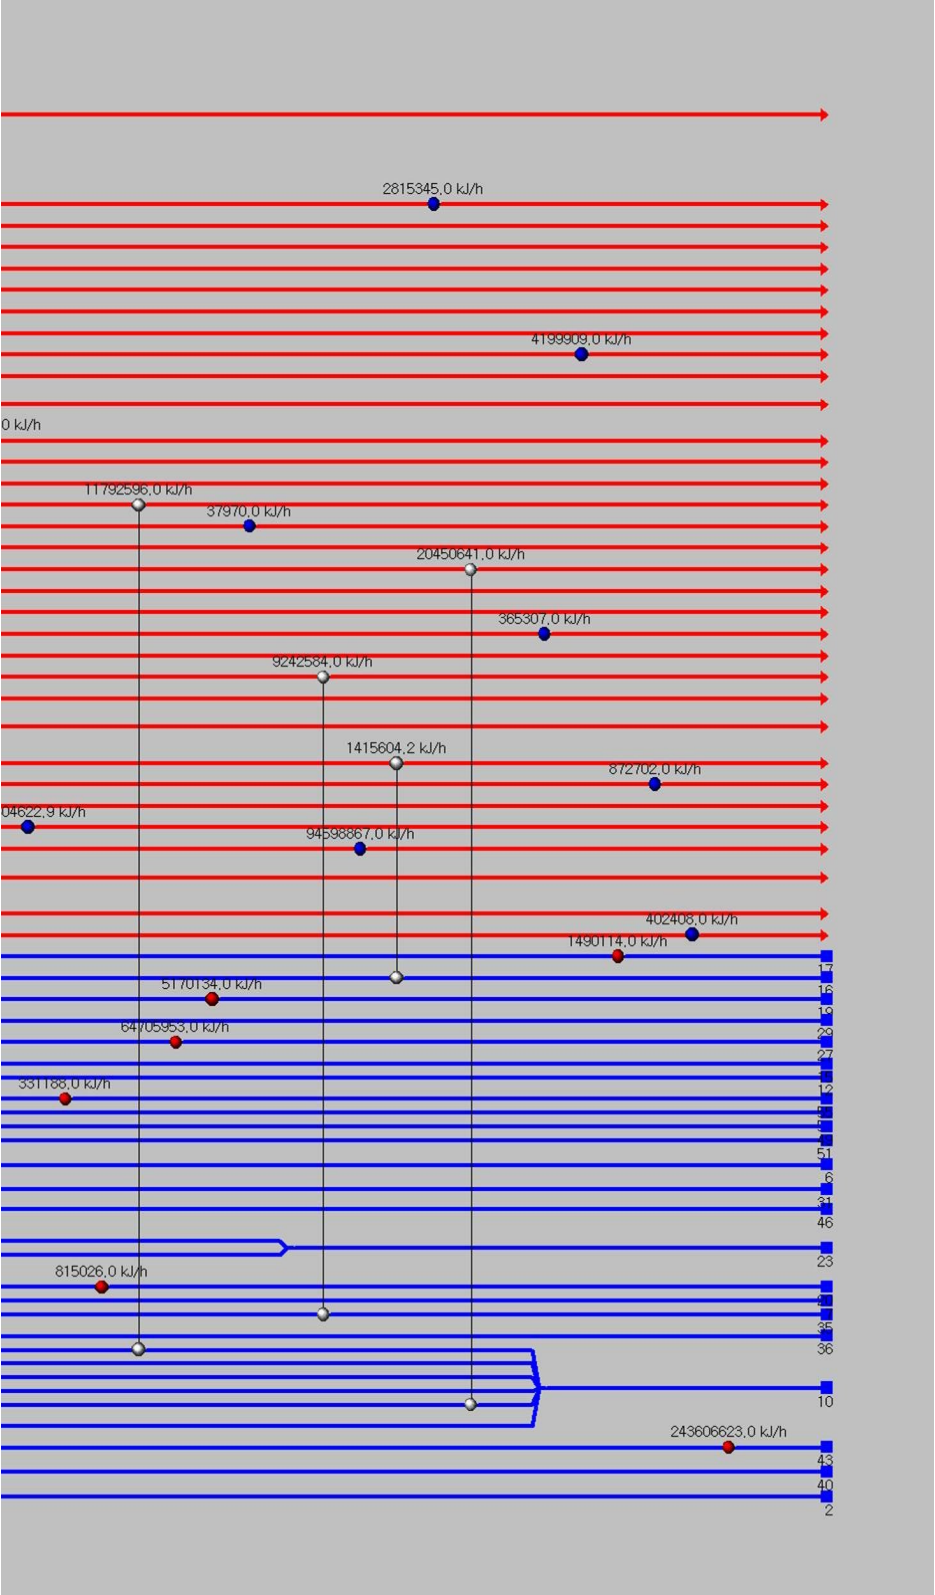

## C. Economic evaluation

### 1. Reactor sizing and costing

**Table S.4** Installed costs of reactor for the design A

| Reactor          | Scaling stream flow (kg/hr) | New stream flow (kg/hr) | Size ratio | # of unit | Original equipment cost (per unit) | Scaling exponent | Scaled cost (per unit) | Installation factor | Installed cost (\$) |
|------------------|-----------------------------|-------------------------|------------|-----------|------------------------------------|------------------|------------------------|---------------------|---------------------|
| R-1 <sup>a</sup> | 27,292                      | 27,292                  | 1.00       | 10        | 5,017,797                          | 0.67             | 5,640,491              | 1.12                | 56,404,913          |
| R-2 <sup>a</sup> | 3,163                       | 3,163                   | 1.00       | 15        | 71,360                             | 0.67             | 200,643                | 2.81                | 3,009,640           |
| R-3 <sup>a</sup> | 562                         | 562                     | 1.00       | 15        | 118,390                            | 0.67             | 267,320                | 2.26                | 4,009,799           |
| R-4 <sup>a</sup> | 519                         | 519                     | 1.00       | 9         | 370,644                            | 0.67             | 575,359                | 1.55                | 5,178,229           |
| R-5 <sup>b</sup> | 227,642                     | 225,712                 | 0.99       | 7         | 571,588                            | 0.67             | 857,381                | 1.50                | 6,001,670           |
| R-6 <sup>a</sup> | 346                         | 346                     | 1.00       | 42        | 57,414                             | 0.67             | 151,937                | 2.65                | 6,381,373           |
| R-7 <sup>a</sup> | 10,589                      | 10,589                  | 1.00       | 10        | 1,529,913                          | 0.67             | 1,913,282              | 1.25                | 19,132,819          |

<sup>a</sup> Taken from Aspen Process Economic Analyzer.

<sup>b</sup> Taken from study by Xing. *et al.* (Xing et al., 2010)

## 2. Total capital investment

**Table S.5** Project cost worksheet including total direct cost and total capital investment for the design A

| Sub-processing steps                                                                                           |       |                      | Installed costs (\$) |
|----------------------------------------------------------------------------------------------------------------|-------|----------------------|----------------------|
| Biomass handling*                                                                                              |       |                      | 25,777,913           |
| Pretreatment                                                                                                   |       |                      | 37,262,462           |
| LA production                                                                                                  |       |                      | 68,329,351           |
| GVL production                                                                                                 |       |                      | 7,283,705            |
| Butene production                                                                                              |       |                      | 5,704,115            |
| Butene oligomerization                                                                                         |       |                      | 5,372,459            |
| FF production                                                                                                  |       |                      | 8,348,812            |
| SBP recovery                                                                                                   |       |                      | 2,322,068            |
| FFA production                                                                                                 |       |                      | 6,427,182            |
| THFA and 1,2-PeD production                                                                                    |       |                      | 19,512,726           |
| THFA and 1,2-PeD recovery                                                                                      |       |                      | 12,207,542           |
| Heat production                                                                                                |       |                      | 36,442,338           |
| Wastewater treatment                                                                                           |       |                      | 18,251,920           |
| Storage                                                                                                        |       |                      | 1,895,811            |
| Utility                                                                                                        |       |                      | 14,691,857           |
| <b>Total installed cost</b>                                                                                    |       |                      | <b>244,052,346</b>   |
| Warehouse                                                                                                      | 4.0%  | of ISBL <sup>#</sup> | 6,910,817            |
| Site development                                                                                               | 9.0%  | of ISBL <sup>#</sup> | 15,549,338           |
| Additional piping                                                                                              | 4.5%  | of ISBL <sup>#</sup> | 7,774,669            |
| <b>Total direct cost (TDC)</b>                                                                                 |       |                      | <b>274,287,170</b>   |
| Prorateable expenses                                                                                           | 10.0% | of TDC               | 27,428,717           |
| Field expenses                                                                                                 | 10.0% | of TDC               | 27,428,717           |
| Home office & construction fee                                                                                 | 20.0% | of TDC               | 54,857,434           |
| Project contingency                                                                                            | 10.0% | of TDC               | 27,428,717           |
| Other costs (Start-Up, Permits, etc.)                                                                          | 10.0% | of TDC               | 27,428,717           |
| <b>Total indirect cost</b>                                                                                     |       |                      | <b>164,572,302</b>   |
| <b>Fixed capital investment (FCI)</b>                                                                          |       |                      | <b>438,859,472</b>   |
| Land                                                                                                           |       |                      | 1,848,000            |
| Working capital                                                                                                | 5.0%  | of FCI               | 21,942,974           |
| <b>Total capital investment (TCI)</b>                                                                          |       |                      | <b>462,650,445</b>   |
| *Biomass handling not included in this calculation.                                                            |       |                      |                      |
| <sup>#</sup> Inside-battery-limits (ISBL) equipment costs include pretreatment, conversion and recovery steps. |       |                      |                      |

### 3. Fixed operating cost

**Table S.6** Fixed operating cost worksheet including labor, maintenance, and insurance costs for the design A

| <b>Labor and supervision</b>                                                                                   | <b>Salary</b>             | <b># required</b> | <b>Cost (\$ per year)</b> |
|----------------------------------------------------------------------------------------------------------------|---------------------------|-------------------|---------------------------|
| Plant manager                                                                                                  | 141,569                   | 1                 | 141,569                   |
| Plant engineer                                                                                                 | 67,414                    | 2                 | 134,828                   |
| Maintenance supervisor                                                                                         | 54,894                    | 1                 | 54,894                    |
| Maintenance technician                                                                                         | 38,522                    | 12                | 462,266                   |
| Lab manager                                                                                                    | 53,931                    | 1                 | 53,931                    |
| Lab technician                                                                                                 | 38,522                    | 2                 | 77,044                    |
| Lab tech-enzyme                                                                                                | 38,771                    | 2                 | 77,044                    |
| Shift supervisor                                                                                               | 46,227                    | 4                 | 184,906                   |
| Shift operators                                                                                                | 38,522                    | 20                | 770,443                   |
| Shift oper-enzyme                                                                                              | 38,771                    | 8                 | 308,177                   |
| Yard employees                                                                                                 | 26,966                    | 4                 | 107,862                   |
| Clerks and secretaries                                                                                         | 34,670                    | 3                 | 104,010                   |
| Total salaries                                                                                                 |                           |                   | 2,500,000                 |
| Labor burden (90%)                                                                                             |                           |                   | 2,200,000                 |
| <b>Total labor cost</b>                                                                                        |                           |                   | <b>4,700,000</b>          |
| <b>Other overhead</b>                                                                                          |                           |                   | <b>Annual cost (\$)</b>   |
| Maintenance                                                                                                    | 3.0% of ISBL <sup>#</sup> |                   | 5,183,113                 |
| Property insurance                                                                                             | 0.7% of FCI <sup>*</sup>  |                   | 3,072,016                 |
| <b>Total fixed operating cost</b>                                                                              |                           |                   | <b>12,961,382</b>         |
| <sup>#</sup> Inside-battery-limits (ISBL) equipment costs include pretreatment, conversion and recovery steps. |                           |                   |                           |
| <sup>*</sup> Fixed capital investment                                                                          |                           |                   |                           |

## 4. Discounted Cash Flow

**Table S.7** Discounted cash flow for the design A

| Year                          | -2         | -1          | 0           | 1           | 2           | 3            | 4            | 5            | 6            | 7            | 8           | 9           | 10          |
|-------------------------------|------------|-------------|-------------|-------------|-------------|--------------|--------------|--------------|--------------|--------------|-------------|-------------|-------------|
| Capital investment            | 14,043,503 | 105,326,273 | 56,174,012  |             |             |              |              |              |              |              |             |             |             |
| Land                          | 1,848,000  |             |             |             |             |              |              |              |              |              |             |             |             |
| Working capital               |            |             | 21,942,974  |             |             |              |              |              |              |              |             |             |             |
| Loan payment                  |            |             |             | 39,241,802  | 39,241,802  | 39,241,802   | 39,241,802   | 39,241,802   | 39,241,802   | 39,241,802   | 39,241,802  | 39,241,802  | 39,241,802  |
| Loan interest payment         | 1,685,220  | 14,324,373  | 21,065,255  | 21,065,255  | 19,611,131  | 18,040,677   | 16,344,587   | 14,512,810   | 12,534,491   | 10,397,906   | 8,090,394   | 5,598,282   | 2,906,800   |
| Loan principal                | 21,065,255 | 179,054,664 | 263,315,683 | 245,139,136 | 225,508,465 | 204,307,341  | 181,410,127  | 156,681,135  | 129,973,824  | 101,129,929  | 69,978,521  | 36,335,001  | 0           |
| THFA sales                    |            |             |             | 85,385,866  | 97,583,846  | 97,583,846   | 97,583,846   | 97,583,846   | 97,583,846   | 97,583,846   | 97,583,846  | 97,583,846  | 97,583,846  |
| JFA sales                     |            |             |             | 39,001,785  | 44,573,469  | 44,573,469   | 44,573,469   | 44,573,469   | 44,573,469   | 44,573,469   | 44,573,469  | 44,573,469  | 44,573,469  |
| 1,2-PeD sales                 |            |             |             | 43,155,270  | 49,320,308  | 49,320,308   | 49,320,308   | 49,320,308   | 49,320,308   | 49,320,308   | 49,320,308  | 49,320,308  | 49,320,308  |
| Total annual sales            |            |             |             | 167,542,921 | 191,477,624 | 191,477,624  | 191,477,624  | 191,477,624  | 191,477,624  | 191,477,624  | 191,477,624 | 191,477,624 | 191,477,624 |
| Feedstock cost                |            |             |             | 51,564,911  | 58,931,326  | 58,931,326   | 58,931,326   | 58,931,326   | 58,931,326   | 58,931,326   | 58,931,326  | 58,931,326  | 58,931,326  |
| Baghouse bags                 |            |             |             | 466,183     |             |              |              |              | 466,183      |              |             |             |             |
| Other variable costs          |            |             |             | 54,345,111  | 57,968,119  | 57,968,119   | 57,968,119   | 57,968,119   | 57,968,119   | 57,968,119   | 57,968,119  | 57,968,119  | 57,968,119  |
| Fixed operating costs         |            |             |             | 12,961,382  | 12,961,382  | 12,961,382   | 12,961,382   | 12,961,382   | 12,961,382   | 12,961,382   | 12,961,382  | 12,961,382  | 12,961,382  |
| Total product cost            |            |             |             | 119,337,587 | 129,860,827 | 129,860,827  | 129,860,827  | 129,860,827  | 130,327,010  | 129,860,827  | 129,860,827 | 129,860,827 | 129,860,827 |
| Annual depreciation           |            |             |             |             |             |              |              |              |              |              |             |             |             |
| General Plant                 |            |             |             |             |             |              |              |              |              |              |             |             |             |
| MACRS method (7yr)            |            |             |             | 14.290%     | 24.490%     | 17.490%      | 12.490%      | 8.930%       | 8.920%       | 8.930%       | 4.460%      |             |             |
| Depreciation charge           |            |             |             | 57,505,408  | 98,551,956  | 70,382,757   | 50,261,900   | 35,935,850   | 35,895,608   | 35,935,850   | 17,947,804  |             |             |
| Remaining value               |            |             |             | 344,911,725 | 246,359,769 | 175,977,013  | 125,715,113  | 89,779,263   | 53,883,654   | 17,947,804   | 0           |             |             |
| Steam plant (heat production) |            |             |             |             |             |              |              |              |              |              |             |             |             |
| MACRS method (20yr)           |            |             |             | 3.750%      | 7.219%      | 6.677%       | 6.177%       | 5.713%       | 5.285%       | 4.888%       | 4.522%      | 4.462%      | 4.461%      |
| Depreciation charge           |            |             |             | 1,366,588   | 2,630,772   | 2,433,255    | 2,251,043    | 2,081,951    | 1,925,978    | 1,781,301    | 1,647,923   | 1,626,057   | 1,625,693   |
| Remaining value               |            |             |             | 35,075,750  | 32,444,978  | 30,011,723   | 27,760,680   | 25,678,729   | 23,752,751   | 21,971,450   | 20,323,527  | 18,697,470  | 17,071,778  |
| Remaining value               |            |             |             | 379,987,476 | 278,804,747 | 205,988,736  | 153,475,792  | 115,457,992  | 77,636,406   | 39,919,254   | 20,323,527  | 18,697,470  | 17,071,778  |
| Net revenue                   |            |             |             | -31,731,917 | -59,177,063 | -29,239,892  | -7,240,734   | 9,086,186    | 10,794,537   | 13,501,739   | 33,930,676  | 54,392,458  | 57,084,304  |
| Losses forward                |            |             |             |             | -31,731,917 | -90,908,979  | -120,148,872 | -127,389,605 | -118,303,420 | -107,508,883 | -94,007,144 | -60,076,468 | -5,684,010  |
| Taxable income                |            |             |             | -31,731,917 | -90,908,979 | -120,148,872 | -127,389,605 | -118,303,420 | -107,508,883 | -94,007,144  | -60,076,468 | -5,684,010  | 51,400,294  |
| Income tax                    |            |             |             | 0           | 0           | 0            | 0            | 0            | 0            | 0            | 0           | 0           | 17,990,103  |
| Annual cash flow              |            |             |             | 8,963,532   | 22,374,995  | 22,374,995   | 22,374,995   | 22,374,995   | 21,908,812   | 22,374,995   | 22,374,995  | 22,374,995  | 4,384,892   |
| Discount factor               | 1.21       | 1.10        | 1.00        | 0.91        | 0.83        | 0.75         | 0.68         | 0.62         | 0.56         | 0.51         | 0.47        | 0.42        | 0.39        |
| Annual present value          |            |             |             | 8,148,666   | 18,491,731  | 16,810,665   | 15,282,423   | 13,893,112   | 12,366,953   | 11,481,910   | 10,438,100  | 9,489,182   | 1,690,566   |
| TPI + Interest                | 21,267,835 | 131,615,711 | 99,182,241  |             |             |              |              |              |              |              |             |             |             |
| NPV                           |            |             | 0           |             |             |              |              |              |              |              |             |             |             |

| Year                          | 11          | 12          | 13          | 14          | 15          | 16          | 17          | 18          | 19          | 20          |
|-------------------------------|-------------|-------------|-------------|-------------|-------------|-------------|-------------|-------------|-------------|-------------|
| Capital investment            |             |             |             |             |             |             |             |             |             |             |
| Land                          |             |             |             |             |             |             |             |             |             |             |
| Working capital               |             |             |             |             |             |             |             |             |             |             |
| Loan payment                  |             |             |             |             |             |             |             |             |             |             |
| Loan interest payment         |             |             |             |             |             |             |             |             |             |             |
| Loan principal                |             |             |             |             |             |             |             |             |             |             |
| THFA sales                    | 97,583,846  | 97,583,846  | 97,583,846  | 97,583,846  | 97,583,846  | 97,583,846  | 97,583,846  | 97,583,846  | 97,583,846  | 97,583,846  |
| JFA sales                     | 44,573,469  | 44,573,469  | 44,573,469  | 44,573,469  | 44,573,469  | 44,573,469  | 44,573,469  | 44,573,469  | 44,573,469  | 44,573,469  |
| 1,2-PeD sales                 | 49,320,308  | 49,320,308  | 49,320,308  | 49,320,308  | 49,320,308  | 49,320,308  | 49,320,308  | 49,320,308  | 49,320,308  | 49,320,308  |
| Total annual sales            | 191,477,624 | 191,477,624 | 191,477,624 | 191,477,624 | 191,477,624 | 191,477,624 | 191,477,624 | 191,477,624 | 191,477,624 | 191,477,624 |
| Feedstock cost                | 58,931,326  | 58,931,326  | 58,931,326  | 58,931,326  | 58,931,326  | 58,931,326  | 58,931,326  | 58,931,326  | 58,931,326  | 58,931,326  |
| Baghouse bags                 | 466,183     |             |             |             |             | 466,183     |             |             |             |             |
| Other variable costs          | 57,968,119  | 57,968,119  | 57,968,119  | 57,968,119  | 57,968,119  | 57,968,119  | 57,968,119  | 57,968,119  | 57,968,119  | 57,968,119  |
| Fixed operating costs         | 12,961,382  | 12,961,382  | 12,961,382  | 12,961,382  | 12,961,382  | 12,961,382  | 12,961,382  | 12,961,382  | 12,961,382  | 12,961,382  |
| Total product cost            | 130,327,010 | 129,860,827 | 129,860,827 | 129,860,827 | 129,860,827 | 130,327,010 | 129,860,827 | 129,860,827 | 129,860,827 | 129,860,827 |
| Annual depreciation           |             |             |             |             |             |             |             |             |             |             |
| General Plant                 |             |             |             |             |             |             |             |             |             |             |
| MACRS method (7yr)            |             |             |             |             |             |             |             |             |             |             |
| Depreciation charge           |             |             |             |             |             |             |             |             |             |             |
| Remaining value               |             |             |             |             |             |             |             |             |             |             |
| Steam plant (heat production) |             |             |             |             |             |             |             |             |             |             |
| MACRS method (20yr)           | 4.462%      | 4.461%      | 4.462%      | 4.461%      | 4.462%      | 4.461%      | 4.462%      | 4.461%      | 4.462%      | 4.461%      |
| Depreciation charge           | 1,626,057   | 1,625,693   | 1,626,057   | 1,625,693   | 1,626,057   | 1,625,693   | 1,626,057   | 1,625,693   | 1,626,057   | 1,625,693   |
| Remaining value               | 15,445,721  | 13,820,028  | 12,193,971  | 10,568,278  | 8,942,221   | 7,316,528   | 5,690,471   | 4,064,778   | 2,438,721   | 813,029     |
| Remaining value               | 15,445,721  | 13,820,028  | 12,193,971  | 10,568,278  | 8,942,221   | 7,316,528   | 5,690,471   | 4,064,778   | 2,438,721   | 813,029     |
| Net revenue                   | 59,524,557  | 59,991,104  | 59,990,740  | 59,991,104  | 59,990,740  | 59,524,921  | 59,990,740  | 59,991,104  | 59,990,740  | 59,991,104  |
| Losses forward                | 0           | 0           | 0           | 0           | 0           | 0           | 0           | 0           | 0           | 0           |
| Taxable income                | 59,524,557  | 59,991,104  | 59,990,740  | 59,991,104  | 59,990,740  | 59,524,921  | 59,990,740  | 59,991,104  | 59,990,740  | 59,991,104  |
| Income tax                    | 20,833,595  | 20,996,886  | 20,996,759  | 20,996,886  | 20,996,759  | 20,833,722  | 20,996,759  | 20,996,886  | 20,996,759  | 20,996,886  |
| Annual cash flow              | 40,317,019  | 40,619,910  | 40,620,038  | 40,619,910  | 40,620,038  | 40,316,891  | 40,620,038  | 40,619,910  | 40,620,038  | 40,619,910  |
| Discount factor               | 0.35        | 0.32        | 0.29        | 0.26        | 0.24        | 0.22        | 0.20        | 0.18        | 0.16        | 0.15        |
| Annual present value          | 14,130,869  | 12,942,755  | 11,766,178  | 10,696,492  | 9,724,114   | 8,774,130   | 8,036,458   | 7,305,848   | 6,641,701   | 6,037,891   |
| TPI + Interest                |             |             |             |             |             |             |             |             |             |             |
| NPV                           |             |             |             |             |             |             |             |             |             |             |

| Year                          | 21          | 22          | 23          | 24          | 25          | 26          | 27          | 28          | 29          | 30          |
|-------------------------------|-------------|-------------|-------------|-------------|-------------|-------------|-------------|-------------|-------------|-------------|
| Capital investment            |             |             |             |             |             |             |             |             |             |             |
| Land                          |             |             |             |             |             |             |             |             |             | -1,848,000  |
| Working capital               |             |             |             |             |             |             |             |             |             | -21,942,974 |
| Loan payment                  |             |             |             |             |             |             |             |             |             |             |
| Loan interest payment         |             |             |             |             |             |             |             |             |             |             |
| Loan principal                |             |             |             |             |             |             |             |             |             |             |
| THFA sales                    | 97,583,846  | 97,583,846  | 97,583,846  | 97,583,846  | 97,583,846  | 97,583,846  | 97,583,846  | 97,583,846  | 97,583,846  | 97,583,846  |
| JFA sales                     | 44,573,469  | 44,573,469  | 44,573,469  | 44,573,469  | 44,573,469  | 44,573,469  | 44,573,469  | 44,573,469  | 44,573,469  | 44,573,469  |
| 1,2-PeD sales                 | 49,320,308  | 49,320,308  | 49,320,308  | 49,320,308  | 49,320,308  | 49,320,308  | 49,320,308  | 49,320,308  | 49,320,308  | 49,320,308  |
| Total annual sales            | 191,477,624 | 191,477,624 | 191,477,624 | 191,477,624 | 191,477,624 | 191,477,624 | 191,477,624 | 191,477,624 | 191,477,624 | 191,477,624 |
| Feedstock cost                | 58,931,326  | 58,931,326  | 58,931,326  | 58,931,326  | 58,931,326  | 58,931,326  | 58,931,326  | 58,931,326  | 58,931,326  | 58,931,326  |
| Baghouse bags                 | 466,183     |             |             |             |             | 466,183     |             |             |             |             |
| Other variable costs          | 57,968,119  | 57,968,119  | 57,968,119  | 57,968,119  | 57,968,119  | 57,968,119  | 57,968,119  | 57,968,119  | 57,968,119  | 57,968,119  |
| Fixed operating costs         | 12,961,382  | 12,961,382  | 12,961,382  | 12,961,382  | 12,961,382  | 12,961,382  | 12,961,382  | 12,961,382  | 12,961,382  | 12,961,382  |
| Total product cost            | 130,327,010 | 129,860,827 | 129,860,827 | 129,860,827 | 129,860,827 | 130,327,010 | 129,860,827 | 129,860,827 | 129,860,827 | 129,860,827 |
| Annual depreciation           |             |             |             |             |             |             |             |             |             |             |
| General Plant                 |             |             |             |             |             |             |             |             |             |             |
| MACRS method (7yr)            |             |             |             |             |             |             |             |             |             |             |
| Depreciation charge           |             |             |             |             |             |             |             |             |             |             |
| Remaining value               |             |             |             |             |             |             |             |             |             |             |
| Steam plant (heat production) |             |             |             |             |             |             |             |             |             |             |
| MACRS method (20yr)           | 2.231%      |             |             |             |             |             |             |             |             |             |
| Depreciation charge           | 813,029     |             |             |             |             |             |             |             |             |             |
| Remaining value               | 0           |             |             |             |             |             |             |             |             |             |
| Remaining value               | 0           |             |             |             |             |             |             |             |             |             |
| Net revenue                   | 60,337,585  | 61,616,797  | 61,616,797  | 61,616,797  | 61,616,797  | 61,150,614  | 61,616,797  | 61,616,797  | 61,616,797  | 61,616,797  |
| Losses forward                | 0           | 0           | 0           | 0           | 0           | 0           | 0           | 0           | 0           | 0           |
| Taxable income                | 60,337,585  | 61,616,797  | 61,616,797  | 61,616,797  | 61,616,797  | 61,150,614  | 61,616,797  | 61,616,797  | 61,616,797  | 61,616,797  |
| Income tax                    | 21,118,155  | 21,565,879  | 21,565,879  | 21,565,879  | 21,565,879  | 21,402,715  | 21,565,879  | 21,565,879  | 21,565,879  | 21,565,879  |
| Annual cash flow              | 40,032,459  | 40,050,918  | 40,050,918  | 40,050,918  | 40,050,918  | 39,747,899  | 40,050,918  | 40,050,918  | 40,050,918  | 40,050,918  |
| Discount factor               | 0.14        | 0.12        | 0.11        | 0.10        | 0.09        | 0.08        | 0.08        | 0.07        | 0.06        | 0.06        |
| Annual present value          | 5,409,609   | 4,920,094   | 4,472,813   | 4,066,193   | 3,696,539   | 3,335,065   | 3,054,991   | 2,777,265   | 2,524,786   | 2,295,260   |
| TPI + Interest                |             |             |             |             |             |             |             |             |             | -1,363,426  |
| NPV                           |             |             |             |             |             |             |             |             |             |             |



## References

- Xing, R., Subrahmanyam, A.V., Olcay, H., Qi, W., van Walsum, G.P., Pendse, H., Huber, G.W. 2010. Production of jet and diesel fuel range alkanes from waste hemicellulose-derived aqueous solutions. *Green chemistry*, **12**(11), 1933-1946.
